# How many individuals share a mitochondrial genome?

Mikkel M Andersen<sup>1</sup> and David J Balding<sup>2,3,\*</sup>

<sup>1</sup>Department of Mathematical Sciences, Aalborg University, Aalborg, Denmark

<sup>2</sup>Melbourne Integrative Genomics, Royal Parade, University of Melbourne, Vic 3010,  
Australia

<sup>3</sup>Genetics Institute, University College London, Gower St, WC1E 6BT, UK

\*Corresponding author: [dbalding@unimelb.edu.au](mailto:dbalding@unimelb.edu.au)

August 7, 2018

## Abstract

Mitochondrial DNA (mtDNA) is useful to assist with identification of the source of a biological sample, or to confirm matrilineal relatedness. Although the autosomal genome is much larger, mtDNA has an advantage for forensic applications of multiple copy number per cell, allowing better recovery of sequence information from degraded samples. In addition, biological samples such as fingernails, old bones, teeth and hair have mtDNA but little or no autosomal DNA. The relatively low mutation rate of the mitochondrial genome (mitogenome) means that there can be large sets of matrilineal-related individuals sharing a common mitogenome. Here we present the `mitolina` simulation software that we use to describe the distribution of the number of mitogenomes in a population that match a given mitogenome, and investigate its dependence on population size and growth rate, and on a database count of the mitogenome. Further, we report on the distribution of the number of meioses separating pairs of individuals with matching mitogenome. Our results have important implications for assessing the weight of mtDNA profile evidence in forensic science, but mtDNA analysis has many non-human applications, for example in tracking the source of ivory. Our methods and software can also be used for simulations to validate models of population history in human or non-human populations.

## 1 **Author Summary**

2 The maternally-inherited mitochondrial DNA (mtDNA) represents only a small fraction of the hu-  
3 man genome, but mtDNA profiles are important in forensic science, for example when a biological  
4 evidence sample is degraded or when maternal relatedness is questioned. For forensic mtDNA  
5 analysis, it is important to know how many individuals share a mtDNA profile. We present a  
6 simulation model of mtDNA profile evolution, implemented in open-source software, and use it to  
7 describe the distribution of the number of individuals with matching mitogenomes, and their matri-  
8 lineal relatedness. The latter is measured as the number of mother-child pairs in the lineage linking  
9 two matching individuals. We also describe how these distributions change when conditioning on  
10 a count of the profile in a frequency database.

## 11 **Introduction**

12 Human mitochondrial DNA (mtDNA) has long been a useful tool to identify war casualties and  
13 victims of mass disasters, the sources of biological samples derived from crime scenes or to confirm  
14 matrilineal relatedness [1, 2, 3]. The autosomal genome is much larger and has higher discriminatory  
15 power, but the mitochondrial genome (mitogenome) has multiple copies per cell, allowing better  
16 recovery of sequence information from degraded samples [1, 3], including ancient DNA [4, 5]. In  
17 addition, some biological samples such as fingernails, old bones, teeth and hair have mtDNA but  
18 little or heavily degraded autosomal DNA.

19 It has now become widely feasible to sequence all 16,569 mitogenome sites as part of a forensic  
20 investigation [6, 7, 8]. For autosomal short tandem repeat (STR) profiles, there are two alleles per  
21 locus and because of the effects of recombination, the alleles at distinct loci are treated as inde-  
22 pendent, after any adjustments for sample size, coancestry and direct relatedness [9]. In contrast,  
23 the maternally-inherited mitogenome is non-recombining, behaving like a single locus at which  
24 many alleles, or haplotypes, can arise. Due to finite population size and relatedness, the variation  
25 in mitogenomes in any extant population is greatly restricted compared with what is potentially  
26 available given the genome length. Whereas a match of two mitogenomes without recent shared  
27 ancestry is in effect impossible, there can be large sets of individuals sharing the same mitogenome  
28 due to matrilineal relatedness that is distant compared with known relatives but much closer than

29 is typical for pairs of individuals in the population.

30 This limited variation has important implications for the use of mtDNA to help identify indi-  
31 viduals or establish relatedness. A match between the mtDNA obtained from bones found under  
32 a Leicester UK carpark and a living matrilineal relative of the former King of England, Richard  
33 III, played an important role in establishing the bones as those of the king. However, in contrast  
34 with popular reports of genetic evidence “proving” the identification, the mtDNA evidence was not  
35 decisive, contributing a likelihood ratio (LR) of 478 towards an overall LR of 6.7 million in favour  
36 of the identification [10]. Although that mitogenome was at the time unobserved in the available  
37 databases, its observation in both the skeleton and a contemporary individual meant that it was  
38 expected to exist in hundreds and perhaps thousands of others. The public interest in the story led  
39 to multiple matches being subsequently observed in contemporary individuals, raising the question  
40 of how many humans alive today share this “royal” mitogenome?

41 We recently addressed similar questions for paternally-inherited Y chromosome profiles [11].  
42 Forensic Y profiles focus on a few tens of STR loci, but these can have a combined mutation rate as  
43 high as 1 per 7 generations [11, 12], much higher than the mutation rate for the entire mitogenome,  
44 for which estimates range up to around 1 per 70 generations (see Materials and Methods). We  
45 showed that the high mutation rate of Y profiles has dramatic consequences for evaluating weight  
46 of evidence. For example, males with matching Y profiles are related through a lineage of up to  
47 a few tens of meioses. Further, the number of males with a matching Y profile varies only weakly  
48 with population size, and since the population size relevant to a forensic identification problem  
49 is typically unknown, it follows that the concept of a match probability that can be useful for  
50 autosomal DNA profiles is of little value for Y profiles.

51 Because of the lower mutation rate for the mitogenome, the situation is less extreme for mtDNA  
52 profiles than for Y profiles. Here we describe the distribution of the number of individuals with  
53 the same mitogenome as a randomly-chosen individual under three demographic scenarios and two  
54 mitogenome mutation models, finding that the number is typically of the order of hundreds rather  
55 than the tens that share a Y profile. The number of mitogenome matches is consequently more  
56 sensitive to demographic factors than is the case for Y profiles, but it remains a small fraction  
57 of the population relevant to a typical crime scenario. As we did previously for Y profiles, we  
58 also describe the conditional distributions given database frequencies for the observed mitogenome,

59 assuming that the database is randomly sampled in the population. We show for example that a  
60 mitogenome that is unobserved in a large database can nevertheless exist in hundreds of individuals  
61 in the population. We also show that individuals sharing a mitogenome are related, typically within  
62 up to a few hundred meioses, which is much more distant than recognised relationships but still  
63 much closer than the relatedness of random pairs of individuals in a large population. Therefore  
64 the matching individuals may not be well-mixed in the population so that database statistics can  
65 be an unreliable guide to the number of matching individuals in the population.

## 66 Results

67 See Materials and Methods for details of our two mutation models, based on [13] and [14], and  
68 three demographic scenarios which we denote 1.2M growth, 1.2M constant and 300K constant.

69 As for Y profiles, it is difficult to rigorously check our simulation models against empirical  
70 databases because real-world databases often result from informal sampling schemes that are far  
71 from random samples. They are often drawn from a much larger population than is relevant to  
72 a specific crime scenario, and sometimes from a number of different administrative regions such  
73 as states. However, broad-brush comparisons are useful and for this purpose we identified a US  
74 Caucasian database of 263 mitogenomes [15], which includes 259 distinct haplotypes, a very high  
75 level of diversity ( $259/263 = 98\%$ ) that reflects sampling from many US states. All our simulated  
76 databases of size 263 show less haplotype diversity than this database, but those under the 1.2M  
77 constant model come close (Figs 1 and A1). We also considered an Iranian database [16] of size 352  
78 with 315 distinct haplotypes (89% diversity). This total included several distinct ethnic identities:  
79 Persians (181, 91% diversity), Qashqais (112, 84% diversity) and Azeris (22, 100% diversity). The  
80 simulated databases of size 352 under the 1.2M growth and 300K constant models show mtDNA  
81 diversity close to that of the Iranian database.

82 Low mitogenome diversity has been reported in three Philippines ethnic groups with 39, 43 and  
83 27 mitogenomes yielding a diversity of 51%, 58% and 81% [17], which may reflect low population  
84 size and isolation. These lower levels of diversity may be appropriate in some forensic contexts,  
85 and would require different demographic models from those presented here.

86 For both mutation schemes, Fig. 2 (black curves, which are the same in each row) shows the  
87 cumulative distribution of the number of mitogenomes in the live population matching that of the

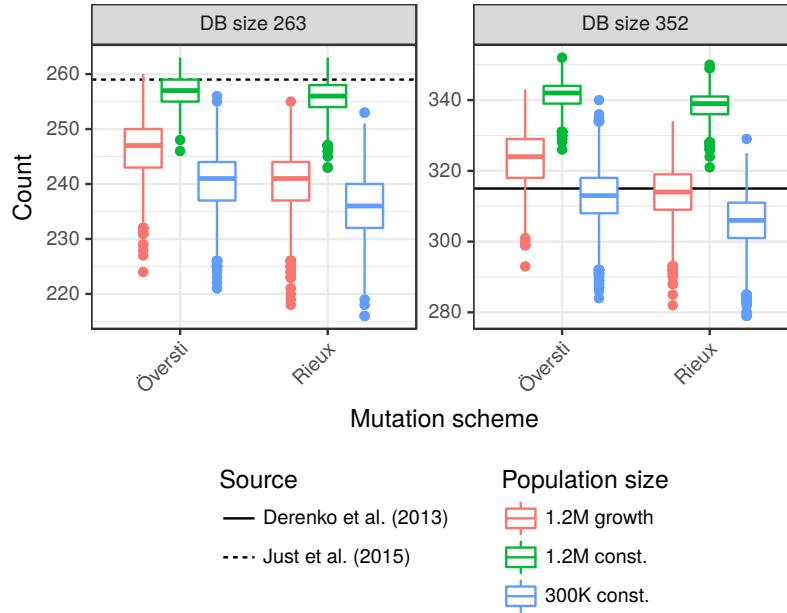

Figure 1: **Comparison of simulated with US and Iranian databases.**

Boxplots show the distribution of the number of distinct haplotypes arising from 2,500 random databases of sizes 263 and 351 obtained under our three demographic and two mutation models. The horizontal reference lines show the numbers of distinct haplotypes in US [15] and Iranian [16] databases of those sizes. See Fig. A1 for distributions of the numbers of singletons and doubletons.

|                      | Mutation scheme |       |       |              |       |       |
|----------------------|-----------------|-------|-------|--------------|-------|-------|
|                      | Rieux [14]      |       |       | Överstí [13] |       |       |
| Demographic scenario | 50%             | 95%   | 99%   | 50%          | 95%   | 99%   |
| 1.2M growth          | 387             | 3,835 | 7,361 | 295          | 2,869 | 5,603 |
| 1.2M const.          | 177             | 761   | 1,148 | 152          | 661   | 1,006 |
| 300K const.          | 193             | 859   | 1,293 | 149          | 675   | 1,085 |

Table 1: **Estimated quantiles of the number of matching individuals.**

Key quantiles of the unconditional distributions (black curves of Fig. 2).

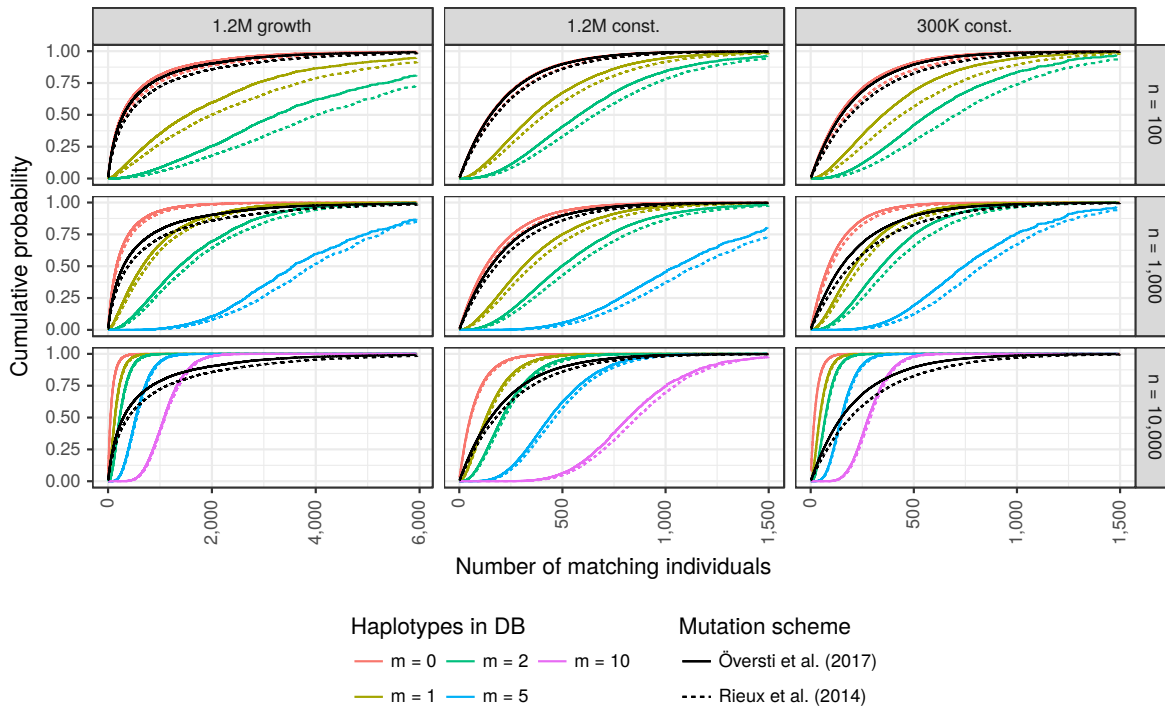

Figure 2: **Cumulative distributions of the number of matching individuals.** Black lines show unconditional distributions. Coloured lines show the distributions conditional on  $m$  matching mitogenomes in a reference database of size  $n$ , for up to five values of  $m$  (see legend for colour codes) and three values of  $n$  (one per row). Quantiles of the distributions shown in the middle column are given in Tables 2 and A3 for the mutation models of [13] and [14], respectively. See text for references to additional tables for the other demographic scenarios.

PoI (person of interest). The distributions (see Table 1 for quantiles) are similar for the 1.2M and 300K constant models (middle and right columns), with the number of sequence matches with the PoI almost always  $< 1,000$ , but for 1.2M growth model some PoI have  $> 5,000$  matches.

These distributions are altered by conditioning on an observation of  $m$  matches in a randomly-sampled database of size  $n$  (Fig. 2, coloured curves). For the largest database we now see a clear difference between the two constant-size populations. For example  $m = 10$  represents 0.1% of the database, consistent with 300 matches in the smaller population, a value that is well supported by the unconditional distribution and so the conditional distribution is centred around 300. However, 0.1% of the larger population is 1,200, which is not supported by the unconditional distribution and so the conditional distribution is shifted towards lower values, with most support between about 600 and 1,200. There is a similar effect for the  $m = 10$  conditional distribution in the 1.2M growth population (note the different x-axis scale).

Estimated quantiles for the solid curves in the middle column of Fig. 2 are given in Table 2. For the other two demographic scenarios under the Översti mutation scheme [13], see Table A1 (300K constant) and Table A2 (1.2M growth). Corresponding quantiles for the Rieux mutation scheme [14] are given in Table A3 (1.2M constant), Table A4 (300K constant) and Table A5 (1.2M growth).

The number of meioses separating individuals with matching mitogenomes ranges up to a few hundred, and is almost never  $> 500$  (Fig. 3). This is close to unrelated for most practical purposes, but random pairs of individuals are very unlikely to be related within 1,000 meioses, and so pairs with matching mitogenomes are much more closely related than average pairs of individuals. Key quantiles for the distributions of matching pairs are given in Table 3. As a guide for comparison, a coalescent theory approximation [18] for the mean numbers of meioses separating a random pair are 100K and 400K for our small and large constant-size populations, respectively.

## Discussion

Empirical mitogenome databases do not in practice represent random samples from a well-defined population, so that detailed comparisons with our simulation models are not meaningful. However, we have verified here that the haplotype diversity generated by our simulation models is broadly comparable with that observed in two real databases from large populations.

| Quantile              | 50%   | 95%   | 99%   |
|-----------------------|-------|-------|-------|
| Unconditional         | 152   | 661   | 1,006 |
| $n = 100 / m = 0$     | 150   | 649   | 989   |
| $n = 1,000 / m = 0$   | 129   | 559   | 852   |
| $n = 10,000 / m = 0$  | 54    | 233   | 357   |
| $n = 100 / m = 1$     | 361   | 1,016 | 1,487 |
| $n = 1,000 / m = 1$   | 312   | 878   | 1,255 |
| $n = 10,000 / m = 1$  | 130   | 367   | 514   |
| $n = 100 / m = 2$     | 581   | 1,414 | 1,727 |
| $n = 1,000 / m = 2$   | 497   | 1,181 | 1,580 |
| $n = 10,000 / m = 2$  | 208   | 487   | 655   |
| $n = 1,000 / m = 5$   | 1,058 | 1,751 | 1,853 |
| $n = 10,000 / m = 5$  | 439   | 813   | 1,007 |
| $n = 10,000 / m = 10$ | 820   | 1,353 | 1,625 |

Table 2: **Estimated quantiles of the number of matching individuals under the mutation scheme of [13]**. Distributions shown in Fig. 2, middle column.  $m$  denotes the observed count of the haplotype in a database of size  $n$ . See text for references to additional tables for the other demographic scenarios.

117 In our related paper on Y profile matching [11], we showed that because of the high mutation  
118 rates of contemporary Y profiles, the numbers of males with Y profile matching a PoI (person of  
119 interest) are low, typically up to a few tens, and that this number is little affected by population  
120 size or growth. Moreover the clusters of matching males are related within a few tens of meioses  
121 and so are unlikely to be randomly distributed in the population relevant to a typical crime scene.  
122 We argued that it was therefore not appropriate to report a match probability (a special case of  
123 the likelihood ratio) to measure the weight of evidence, even though likelihood ratios are central to  
124 the evaluation of autosomal DNA profiles.

125 In the present paper we have shown that the situation for mtDNA evidence is intermediate



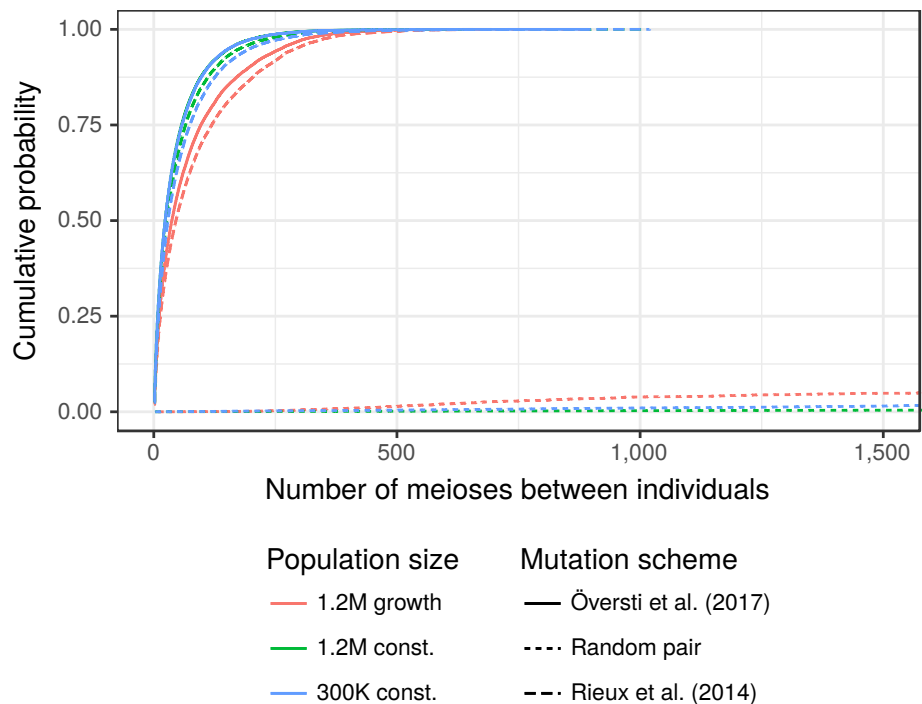

Figure 3: **Number of meioses between pairs of individuals.** The dotted lines correspond to random pairs of individuals, the solid and dashed lines are for pairs observed to have matching mitogenomes. See Table 3 for quantiles.

126 between Y and autosomal profiles. Because the whole-mitogenome mutation rate is an order of  
127 magnitude smaller than the mutation rate for contemporary Y profiles, the number of individuals  
128 matching a PoI is correspondingly larger, and varies more with demography. The unconditional  
129 distribution (Table 1) is very similar for the two constant-size populations that differ in size by  
130 a factor of four, but for the growing population the median number of matches is about twice  
131 as big. As for the case of Y profiles, our simulation-based approach can easily take into account  
132 information from a frequency database, although this requires the assumption that the database is  
133 a random sample from the population, which is rarely the case in practice.

134 The *mitolina* software that we have presented here can be used to inform the evaluation of  
135 the weight of mtDNA evidence in forensic applications, similar to our recommended approach to  
136 presenting Y-profile evidence: simulation models are used to obtain a conservative estimate of the  
137 number of individuals sharing the evidence sample mitogenome, with conditioning on a database

| Demographic scenario | Mutation scheme |     |     |              |     |     |
|----------------------|-----------------|-----|-----|--------------|-----|-----|
|                      | Rieux [14]      |     |     | Översti [13] |     |     |
|                      | 50%             | 95% | 99% | 50%          | 95% | 99% |
| 1.2M growth          | 46              | 294 | 434 | 37           | 262 | 377 |
| 1.2M const.          | 27              | 177 | 304 | 23           | 155 | 266 |
| 300K const.          | 29              | 198 | 341 | 23           | 154 | 272 |

Table 3: **Estimated quantiles of the number of meioses between pairs of individuals with matching mitogenome.** Quantiles of the distributions shown in Fig. 3 (solid and dashed curves).

138 frequency if available. Current methods for evaluating mtDNA evidence rely directly on a database  
139 count of the observed mitogenome [3], and are affected by poor representativeness of the databases,  
140 and its limited informativeness when there are many rare mitotypes. Our approach can also make  
141 use of a database count of the haplotype, but this information is used to adjust an unconditional  
142 distribution and so is less sensitive to the database size and sampling scheme.

143 Limitations of our analysis include the range of demographic scenarios that we can consider,  
144 and the difficulty in assessing which demographic scenario is appropriate for any specific crime.  
145 Our assumption of neutrality is unlikely to be strictly accurate [19], nor our assumption of a  
146 generation time of 25 years, constant over generations. We used two mutation rate schemes [13, 14]  
147 based on phylogenetic estimates, as no pedigree-based mutation rates were available for the entire  
148 mitogenome. Some discrepancy has been noted between the two estimation methods [20], and  
149 the rate may have changed over time [21]. If contemporary pedigree-based mutation rates become  
150 available we could improve our mutation model, but that would not address mutation rate changes  
151 over time. We have not here addressed the case of mixed mtDNA samples or heteroplasmy (multiple  
152 mitogenomes arising from the same individual).

153 While we have focussed our examples on human populations because of the important role of  
154 the mitogenome in human identification and relatedness testing, with appropriate modifications  
155 of the demographic model, *mitolina* and the methods described here can be used for non-human  
156 applications of mtDNA. Examples include tracking the source of ivory [22], other areas of wildlife

157 forensics [23] and inferences about the demographic histories of natural populations [24].

## 158 **Materials and Methods**

### 159 **Mitogenome mutation models**

| Region      | Rieux et al. 2014 [14] |                 | Översti et al. 2017 [13] |                |
|-------------|------------------------|-----------------|--------------------------|----------------|
|             | # sites                | ( $L, U$ )      | # sites                  | ( $L, U$ )     |
| HVS1 + HVS2 | 698                    | (56.40, 100.76) | 1,122                    | (31.23, 72.53) |
| PC1 + PC2   | 7,565                  | (1.43, 2.34)    | 7,565                    | (2.92, 6.00)   |
| PC3         | 3,776                  | (6.42, 10.19)   | 3,776                    | (4.80, 10.53)  |
| rRNA + tRNA | 4,031                  | (1.89, 3.17)    | 4,031                    | (2.35, 5.75)   |
| Mitogenome  | 16,070                 | (2.16, 11.64)   | 16,494                   | (2.40, 13.84)  |

Table 4: **Mutation rates per site and per  $10^7$  generations.**  $L$  and  $U$  denote lower and upper bounds of a 95% highest posterior density interval. The values here are 25 times the per-year rates of [14, 13], because we assume 25-year generations

160 We simulated the mitogenome as a binary sequence subject to neutral mutations, using the  
161 rates estimated by both Rieux et al. (2014) [14] and Översti et al. (2017) [13], shown in Table 4.  
162 They both partitioned the mitogenome into four regions: hypervariable 1+2 (HVS1 + HVS2),  
163 protein coding codon 1+2 (PC1 + PC2), protein coding codon 3 (PC3), and ribosomal-RNA +  
164 transfer-RNA (rRNA + tRNA). However, the HVS1 + HVS2 region of [14] consisted of 698 sites  
165 whereas that of [13] had 1,122 sites, although their total mutation rate estimates for the region are  
166 similar.

### 167 **Population simulations**

168 We simulated populations of mitogenomes under three demographic scenarios. Two constant-size  
169 Wright-Fisher populations, of 50K and 200K females per generation, were simulated for 1,200 gen-  
170 erations. The third scenario started with a constant female population size of 10,257 for 1,000

171 generations, followed by growth at a rate at 2% per generation over 150 generations to reach a  
172 final generation with 200K females. Following [11], individuals in the final three generations are  
173 considered to be “live”, and in those generations males were also simulated making total live pop-  
174 ulation sizes of 300K, 1.2M and 1.2M. All the females in any generation had the same distribution  
175 of offspring number (no between-female variation in reproductive success).

176 We assigned mitogenomes to the founders randomly with replacement from a US Caucasian  
177 database of 263 mitogenomes (259 distinct haplotypes, see Fig. 1) [15], coding each site as 0 if it  
178 matched the rCRS reference sequence [8], and 1 otherwise. Each mother-child transmission was  
179 subject to mutation, which changed a 0 to a 1, and vice versa. The same mutation rate was assigned  
180 to each site within each region, sampled from a normal distribution with 95% interval from Table 4.

181 The mean whole-mitogenome mutation rate per generation was 0.0135 for [13] and 0.0110 for  
182 [14], or about 1 mutation per 74 generations and 1 per 90 generations, respectively. Therefore,  
183 following one line of descent over 1,200 generations, the expected numbers of mutations to affect  
184 the mitogenome are 16.3 using [13] and 13.2 using [14]. The probabilities that there is any site  
185 affected by two mutations and so reverts to its original state during those 1,200 generations are  
186 0.024 and 0.033, respectively.

187 We simulated five population under each of the three demographic scenarios. For each popula-  
188 tion simulation and both mutation models, we conducted five replicates of the sequence evolution  
189 process: assigning sequences to the founders and then mutations at each meiosis. Thus, for each  
190 mutation model and demographic scenario, 25 live populations of mitogenomes were created. In  
191 each live population, a PoI (person of interest) was randomly drawn 10,000 times, and we recorded  
192 how many live individuals had the same mitogenome as the PoI. Thus, a total of  $5 \times 5 \times 10K =$   
193 250K PoIs were sampled for each mutation and demography combination. Further, for 10% of the  
194 PoI, the number of meioses between the PoI and each matching individual was recorded.

195 Following the methodology of [11], in addition to the unconditional distribution of the number  
196 of mitogenome matches between a PoI and another live individual, we use importance sampling  
197 reweighting to approximate the distribution conditional on observing the PoI mitogenome  $m$  times  
198 in a database of size  $n$ , assumed to have been chosen randomly in the population.

199 Software to perform these simulations is implemented in the open-source R packages `mitolina`  
200 [25, 26], based on Rcpp [27], and `malan` [28], previously used for Y profile simulations [11].

## 201 Acknowledgements

202 We thank Walther Parson, Adrien Rieux, Sanne Översti, Charla Marshall, Kimberly Andreaggi,  
203 and Miroslava Derenko for helpful responses to our queries. This work was supported in part by the  
204 Otto Mønsted Foundation and a short term fellowship from the International Society for Forensic  
205 Genetics (ISFG).

## 206 References

- 207 [1] John M Butler and Barbara C Levin. Forensic applications of mitochondrial DNA. *Trends in*  
208 *Biotechnology*, 16(4):158 – 162, 1998.
- 209 [2] A Carracedo, W Bär, P Lincoln, W Mayr, N Morling, B Olaisen, P Schneider, B Budowle,  
210 B Brinkmann, P Gill, M Holland, G Tully, and M Wilson. DNA Commission of the Inter-  
211 national Society for Forensic Genetics: guidelines for mitochondrial DNA typing. *Forensic*  
212 *Science International*, 110(2):79–85, 2000.
- 213 [3] W. Parson, L. Gusmão, D.R. Hares, J.A. Irwin, W.R. Mayr, N. Morling, E. Pokorak, M. Prinz,  
214 A. Salas, P.M. Schneider, and T.J. Parsons. DNA Commission of the International Society for  
215 Forensic Genetics: Revised and extended guidelines for mitochondrial DNA typing. *Forensic*  
216 *Science International: Genetics*, 13:134–142, 2014.
- 217 [4] M. Thomas P. Gilbert, Toomas Kivisild, Bjarne Grønow, Pernille K. Andersen, Ene Metspalu,  
218 Maere Reidla, Erika Tamm, Erik Axelsson, Anders Götherström, Paula F. Campos, Morten  
219 Rasmussen, Mait Metspalu, Thomas F. G. Higham, Jean-Luc Schwenninger, Roger Nathan,  
220 Cees-Jan De Hoog, Anders Koch, Lone Nukaaraq Møller, Claus Andreasen, Morten Meldgaard,  
221 Richard Villems, Christian Bendixen, and Eske Willerslev. Paleo-eskimo mtdna genome reveals  
222 matrilineal discontinuity in greenland. *Science*, 320(5884):1787–1789, 2008.
- 223 [5] Tim H. Heupink, Sankar Subramanian, Joanne L. Wright, Phillip Endicott, Michael Carrington  
224 Westaway, Leon Huynen, Walther Parson, Craig D. Millar, Eske Willerslev, and David M.  
225 Lambert. Ancient mtdna sequences from the first australians revisited. *Proceedings of the*  
226 *National Academy of Sciences*, 113(25):6892–6897, 2016.

- 227 [6] Jennifer D. Churchill, Dixie Peters, Christina Capt, Christina Strobl, Walther Parson, and  
228 Bruce Budowle. Working towards implementation of whole genome mitochondrial DNA se-  
229 quencing into routine casework. *Forensic Science International: Genetics Supplement Series*,  
230 6:e388 – e389, 2017.
- 231 [7] Christina Strobl, Mayra Eduardoff, Magdalena M. Bus, Marie Allen, and Walther Parson.  
232 Evaluation of the precision ID whole mtDNA genome panel for forensic analyses. *Forensic*  
233 *Science International: Genetics*, 35:21 – 25, 2018.
- 234 [8] Richard M Andrews, Iwona Kubacka, Patrick F Chinnery, Robert N Lightowlers, Douglass M  
235 Turnbull, and Neil Howell. Reanalysis and revision of the Cambridge reference sequence for  
236 human mitochondrial DNA. *Nature Genetics*, 23, 1999.
- 237 [9] C.D. Steele and D. Balding. *Weight of evidence for forensic DNA profiles*. Wiley, 2nd edition,  
238 2015.
- 239 [10] T King, G Fortes, P Balaesque, M Thomas, D Balding, P Delsler, R Neumann, W Par-  
240 son, M Knapp, S Walsh, L Tonasso, J Holt, M Kayser, J Appleby, P Forster, D Ekserdjian,  
241 M Hofreiter, and K Schürer. Identification of the remains of King Richard III. *Nat. Commun.*,  
242 5:5631, 2014.
- 243 [11] Mikkel Meyer Andersen and David J Balding. How convincing is a matching Y-chromosome  
244 profile? *PLOS Genetics*, 13(11):e1007028, 2017.
- 245 [12] S Willuweit and L Roewer. The New Y Chromosome Haplotype Reference Database. *Forensic*  
246 *Science International: Genetics*, 15:43–48, 2015.
- 247 [13] Sanni Översti, Päivi Onkamo, Monika Stoljarova, Bruce Budowle, Antti Sajantila, and  
248 Jukka U. Palo. Identification and analysis of mtDNA genomes attributed to Finns reveal  
249 long-stagnant demographic trends obscured in the total diversity. *Scientific Reports*, 7, 2017.
- 250 [14] Adrien Rieux, Anders Eriksson, Mingkun Li, Benjamin Sobkowiak, Lucy A. Weinert, Vera  
251 Warmuth, Andres Ruiz-Linares, Andrea Manica, and François Balloux. Improved Calibration  
252 of the Human Mitochondrial Clock Using Ancient Genomes. *Molecular Biology and Evolution*,  
253 31(10):2780–2792, 2014.

- 254 [15] Rebecca S. Just, Melissa K. Scheible, Spence A. Fast, Kimberly Sturk-Andreaggi, Alexan-  
255 der W. Röck, Jocelyn M. Bush, Jennifer L. Higginbotham, Michelle A. Peck, Joseph D. Ring,  
256 Gabriela E. Huber, Catarina Xavier, Christina Strobl, Elizabeth A. Lyons, Toni M. Diegoli,  
257 Martin Bodner, Liane Fendt, Petra Kralj, Simone Nagl, Daniela Niederwieser, Bettina Zim-  
258 mermann, Walther Parson, and Jodi A. Irwin. Full mtGenome reference data: Development  
259 and characterization of 588 forensic-quality haplotypes representing three U.S. populations.  
260 *Forensic Science International: Genetics*, 14:141–155, 2015.
- 261 [16] Miroslava Derenko, Boris Malyarchuk, Ardeshir Bahmanimehr, Galina Denisova, Maria  
262 Perkova, Shirin Farjadian, and Levon Yepiskoposyan. Complete mitochondrial dna diversity  
263 in iranians. *PLOS ONE*, 8(11):1–14, 11 2013.
- 264 [17] Ellen D. Gunnarsdóttir, Mingkun Li, Marc Bauchet, Knut Finstermeier, and Mark Stonek-  
265 ing. High-throughput sequencing of complete human mtDNA genomes from the Philippines.  
266 *Genome Res.*, 21(1):1–11, 2011.
- 267 [18] John Wakeley. *Coalescent Theory: An Introduction*. Roberts & Co, 2008.
- 268 [19] J. William O. Ballard and David M. Rand. The population biology of mitochondrial DNA  
269 and its phylogenetic implications. *Annual Review of Ecology, Evolution, and Systematics*,  
270 36(1):621–642, 2005.
- 271 [20] Neil Howell, Christy Bogolin Smejkal, D.A. Mackey, P.F. Chinnery, D.M. Turnbull, and  
272 Corinna Herrnstadt. The pedigree rate of sequence divergence in the human mitochondrial  
273 genome: There is a difference between phylogenetic and pedigree rates. *The American Journal*  
274 *of Human Genetics*, 72(3):659–670, 2003.
- 275 [21] Brenna M. Henn, Christopher R. Gignoux, Marcus W. Feldman, and Joanna L. Mountain.  
276 Characterizing the time dependency of human mitochondrial DNA mutation rate estimates.  
277 *Molecular Biology and Evolution*, 26(1):217–230, 2009.
- 278 [22] I Yasuko, N Georgiadis, H Tomoko, and A. Roca. Triangulating the provenance of African  
279 elephants using mitochondrial DNA. *Evolutionary Applications*, 6(2):253–265, 2012.
- 280 [23] A Linacre. Application of mitochondrial dna technologies in wildlife investigation - species  
281 identification. *Forensic Sci Rev*, 18(1):1–8, 2006.

- 282 [24] L. A. Rollins, A. P. Woolnough, R. Sinclair, N. J. Mooney, and W. B. Sherwin. Mitochondrial  
283 DNA offers unique insights into invasion history of the common starling. *Molecular Ecology*,  
284 20(11):2307–2317, 2011.
- 285 [25] R Development Core Team. *R: A Language and Environment for Statistical Computing*. R  
286 Foundation for Statistical Computing, Vienna, Austria, 2018. ISBN 3-900051-07-0.
- 287 [26] Mikkel Meyer Andersen. mitolina: Mitochondrial lineage analysis. [https://github.com/  
288 mikldk/mitolina](https://github.com/mikldk/mitolina), 2018.
- 289 [27] D Eddelbuettel and JJ Balamuta. Extending *R* with *C++*: A Brief Introduction to *Rcpp*.  
290 *PeerJ Preprints*, 5:e3188v1, aug 2017.
- 291 [28] Mikkel M Andersen. malan: MAle Lineage ANalysis. *The Journal of Open Source Software*,  
292 3(25), 2018.



293 **Supplementary Material**

| Quantile              | 50% | 95%   | 99%   |
|-----------------------|-----|-------|-------|
| Unconditional         | 149 | 675   | 1,085 |
| $n = 100 / m = 0$     | 138 | 624   | 989   |
| $n = 1,000 / m = 0$   | 86  | 380   | 585   |
| $n = 10,000 / m = 0$  | 18  | 79    | 121   |
| $n = 100 / m = 1$     | 351 | 1,030 | 1,469 |
| $n = 1,000 / m = 1$   | 211 | 605   | 859   |
| $n = 10,000 / m = 1$  | 44  | 124   | 173   |
| $n = 100 / m = 2$     | 568 | 1,360 | 1,573 |
| $n = 1,000 / m = 2$   | 343 | 816   | 1,103 |
| $n = 10,000 / m = 2$  | 71  | 165   | 221   |
| $n = 1,000 / m = 5$   | 745 | 1,418 | 1,573 |
| $n = 10,000 / m = 5$  | 148 | 275   | 345   |
| $n = 10,000 / m = 10$ | 280 | 450   | 533   |

Table A1: **Approximate quantiles of the number of matching individuals.** Key quantiles of the distributions shown in Fig. 2 for the mutation scheme of Översti [13], and for the 300K constant demographic scenario.

| Quantile              | 50%   | 95%   | 99%    |
|-----------------------|-------|-------|--------|
| Unconditional         | 295   | 2,869 | 5,603  |
| $n = 100 / m = 0$     | 268   | 2,524 | 4,655  |
| $n = 1,000 / m = 0$   | 161   | 1,134 | 2,126  |
| $n = 10,000 / m = 0$  | 46    | 231   | 375    |
| $n = 100 / m = 1$     | 1,548 | 6,042 | 9,108  |
| $n = 1,000 / m = 1$   | 661   | 2,556 | 3,665  |
| $n = 10,000 / m = 1$  | 130   | 406   | 588    |
| $n = 100 / m = 2$     | 3,246 | 9,108 | 10,561 |
| $n = 1,000 / m = 2$   | 1,372 | 3,683 | 5,340  |
| $n = 10,000 / m = 2$  | 223   | 569   | 782    |
| $n = 1,000 / m = 5$   | 3,567 | 7,168 | 9,177  |
| $n = 10,000 / m = 5$  | 534   | 1,038 | 1,302  |
| $n = 10,000 / m = 10$ | 1,084 | 1,762 | 2,140  |

Table A2: **Approximate quantiles of the number of matching individuals.** Key quantiles of the distributions shown in Fig. 2 for the mutation scheme of Översti [13], and for the 1.2M growth demographic scenario.

| Quantile              | 50%   | 95%   | 99%   |
|-----------------------|-------|-------|-------|
| Unconditional         | 177   | 761   | 1,148 |
| $n = 100 / m = 0$     | 174   | 744   | 1,114 |
| $n = 1,000 / m = 0$   | 146   | 627   | 956   |
| $n = 10,000 / m = 0$  | 56    | 244   | 375   |
| $n = 100 / m = 1$     | 416   | 1,154 | 1,627 |
| $n = 1,000 / m = 1$   | 352   | 981   | 1,364 |
| $n = 10,000 / m = 1$  | 137   | 386   | 543   |
| $n = 100 / m = 2$     | 658   | 1,528 | 2,136 |
| $n = 1,000 / m = 2$   | 558   | 1,297 | 1,725 |
| $n = 10,000 / m = 2$  | 219   | 514   | 686   |
| $n = 1,000 / m = 5$   | 1,154 | 2,151 | 2,293 |
| $n = 10,000 / m = 5$  | 463   | 856   | 1,061 |
| $n = 10,000 / m = 10$ | 862   | 1,364 | 1,639 |

Table A3: **Approximate quantiles of the number of matching individuals.** Key quantiles of the distributions shown in Fig. 2 for the mutation scheme of Rieux [14], and for the 1.2M constant demographic scenario.

| Quantile              | 50% | 95%   | 99%   |
|-----------------------|-----|-------|-------|
| Unconditional         | 193 | 859   | 1,293 |
| $n = 100 / m = 0$     | 176 | 784   | 1,190 |
| $n = 1,000 / m = 0$   | 99  | 432   | 676   |
| $n = 10,000 / m = 0$  | 18  | 81    | 124   |
| $n = 100 / m = 1$     | 440 | 1,222 | 1,605 |
| $n = 1,000 / m = 1$   | 242 | 702   | 982   |
| $n = 10,000 / m = 1$  | 45  | 128   | 179   |
| $n = 100 / m = 2$     | 704 | 1,517 | 1,827 |
| $n = 1,000 / m = 2$   | 391 | 932   | 1,228 |
| $n = 10,000 / m = 2$  | 73  | 169   | 226   |
| $n = 1,000 / m = 5$   | 836 | 1,507 | 1,818 |
| $n = 10,000 / m = 5$  | 151 | 285   | 355   |
| $n = 10,000 / m = 10$ | 290 | 458   | 545   |

Table A4: **Approximate quantiles of the number of matching individuals.** Key quantiles of the distributions shown in Fig. 2 for the mutation scheme of Rieux [14], and for the 300K constant demographic scenario.

| Quantile              | 50%   | 95%    | 99%    |
|-----------------------|-------|--------|--------|
| Unconditional         | 387   | 3,835  | 7,361  |
| $n = 100 / m = 0$     | 339   | 3,242  | 5,662  |
| $n = 1,000 / m = 0$   | 182   | 1,291  | 2,342  |
| $n = 10,000 / m = 0$  | 47    | 237    | 386    |
| $n = 100 / m = 1$     | 2,004 | 7,697  | 11,463 |
| $n = 1,000 / m = 1$   | 756   | 2,875  | 4,164  |
| $n = 10,000 / m = 1$  | 133   | 415    | 608    |
| $n = 100 / m = 2$     | 4,027 | 11,275 | 14,221 |
| $n = 1,000 / m = 2$   | 1,544 | 4,133  | 5,579  |
| $n = 10,000 / m = 2$  | 228   | 586    | 806    |
| $n = 1,000 / m = 5$   | 3,926 | 7,799  | 9,608  |
| $n = 10,000 / m = 5$  | 552   | 1,057  | 1,332  |
| $n = 10,000 / m = 10$ | 1,095 | 1,779  | 2,134  |

Table A5: **Approximate quantiles of the number of matching individuals.** Key quantiles of the distributions shown in Fig. 2 for the mutation scheme of Rieux [14], and for the 1.2M growth demographic scenario.

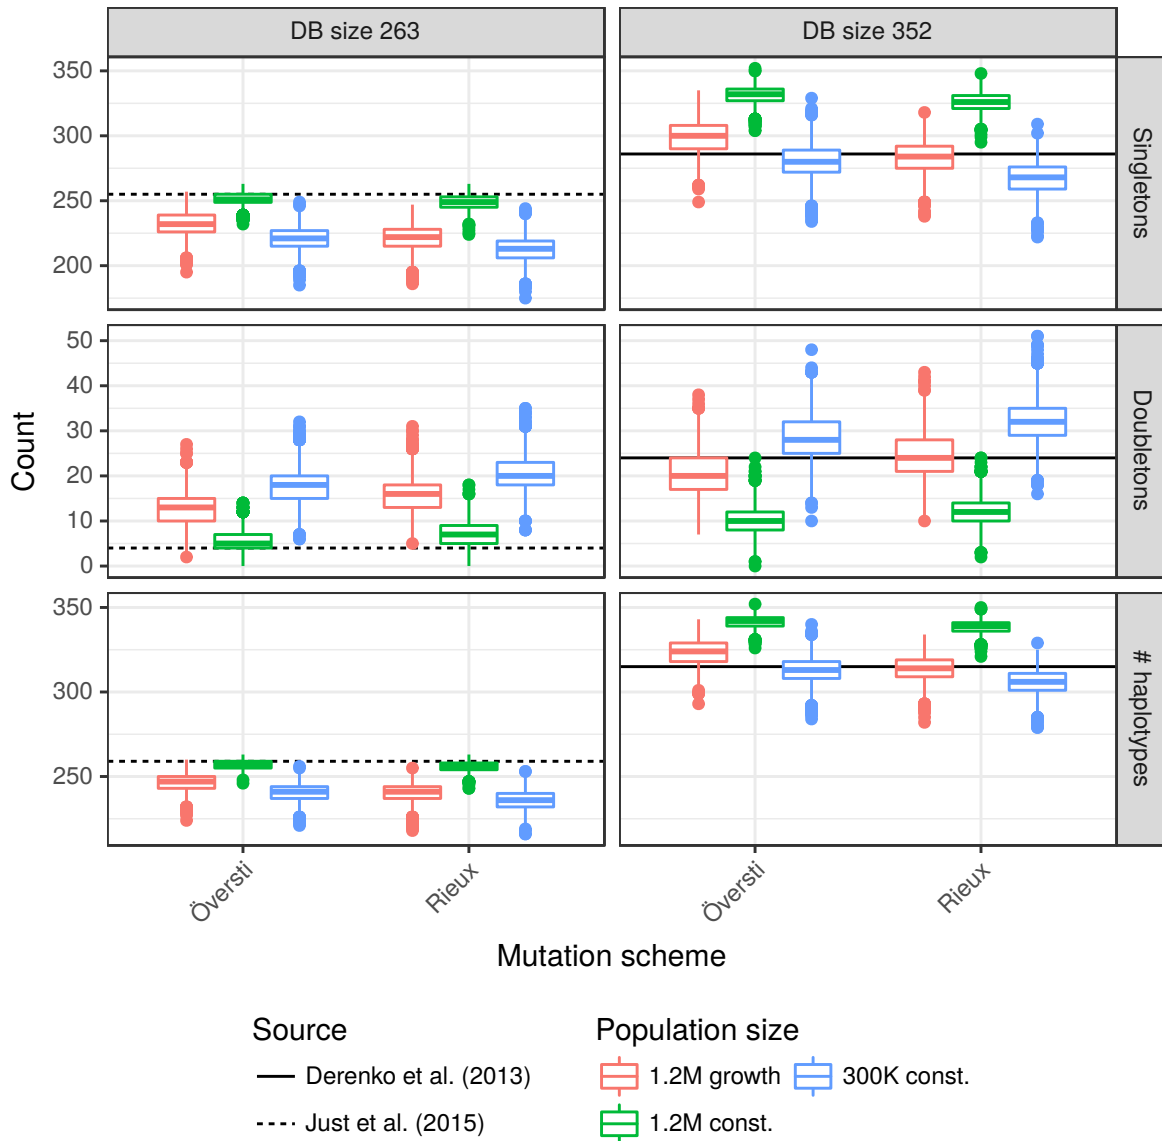

Figure A1: **Comparison of simulated with US and Iranian databases.**

The distribution of the numbers of singletons, doubletons and distinct haplotypes in 2,500 random databases of sizes 263 and 351 obtained under our three demographic and two mutation models. The horizontal reference lines are from [15, 16]. [16] does not provide number of singletons and doubletons, but these numbers (286 and 24, respectively) were obtained directly from the authors.
